# Supplementary material for: Huntingtin facilitates polycomb repressive complex 2
Source: PubMed Central journal article supplement — Hum Mol Genet. 2009 Nov 23;19(4):573–83. doi: 10.1093/hmg/ddp524 (PMC2807366; doi:10.1093/hmg/ddp524), 2009-11-23

## **Seong et al. Huntingtin stimulates polycomb repressive complex 2**

### **Supporting Information**

#### **Supporting Information Tables**

S Table 1. Most frequent peptides (top 20%) from the Htt150 kDa tryptic fragment

S Table 2. Most frequent peptides (top 20%) from the Htt200 kDa tryptic fragment

#### **Supporting Information Figure Legends**

S Figure 1

S Figure 2

S Figure 3

S Figure 4

#### **Supporting Information Figures**

S Figure 1

S Figure 2

S Figure 3

S Figure 4

**S Table 1. Most frequent peptides (top 20%) from the Htt150 kDa tryptic fragment**

| <b>Huntingtin Location (Residues)</b> | <b>Amino Acid Sequence</b>                 |
|---------------------------------------|--------------------------------------------|
| 119-125                               | NSPEFQK                                    |
| 126-146                               | LLGIAMELFLLCSDDAESDVR                      |
| 147-155                               | MVADECLNK                                  |
| 159-167                               | ALMDSNLPR                                  |
| 168-174                               | LQLELYK                                    |
| 192-203                               | FAELAHLVRPQK                               |
| 221-236                               | RPEESVQETLAAAVPK                           |
| 237-251                               | IMASFGNFANDNEIK                            |
| 256-262                               | AFIANLK                                    |
| 322-332                               | YLVPLLQQQVK                                |
| 388-410                               | TPPELLQTLTAVGGIGQLTAAK                     |
| 445-460                               | VLLGEEEALEDDSESR                           |
| 461-473                               | SDVSSSALTASVK                              |
| 461-502                               | SDVSSSALTASVKDEISGELAASSGVSTPGSAGHDIITEQPR |
| 474-502                               | DEISGELAASSGVSTPGSAGHDIITEQPR              |
| 621-633                               | NSSMALQQAHLK                               |
| 668-688                               | IKGDIGQSTDDDSAPLVHCVR                      |
| 670-688                               | GDIGQSTDDDSAPLVHCVR                        |
| 689-700                               | LLSASFLLTGK                                |
| 715-735                               | ALALSCVGAVALHPESFFSK                       |
| 739-767                               | VPLDTTEYPEEQYVSDILNYIDHGDPQVR              |
| 798-814                               | TLTGNTFSLADCIPLLR                          |
| 827-833                               | LACTAVR                                    |
| 860-867                               | NSSYWLVR                                   |
| 868-880                               | TELLETLAEIFR                               |
| 881-888                               | LVSFLEAK                                   |
| 909-924                               | VLNNVVIHLLGDEDPR                           |
| 927-935                               | HVAAASLIR                                  |
| 944-957                               | CDQGQADPVVAVAR                             |
| 958-965                               | DQSSVYLK                                   |
| 966-984                               | LLMHETQPPSHFSVSTITR                        |
| 988-1006                              | GYNLLPSITDVTMENNLSR                        |
| 1007-1021                             | VIAAVSHELITSTTR                            |
| 1150-1168                             | VINICAHVLDDVAPGPAIK                        |
| 1169-1184                             | AALPSLTNPPSLSPIR                           |

**S Table 2. Most frequent peptides (top 20%) from the Htt200 kDa tryptic fragment**

| <b>Huntingtin Location (Residues)</b> | <b>Amino acid sequence</b>        |
|---------------------------------------|-----------------------------------|
| 1254-1264                             | VTLDLQNSTEK                       |
| 1306-1319                             | EPMMATVCVQQLLK                    |
| 1320-1339                             | TLFGTNLASQFDGLSSNPSK              |
| 1379-1398                             | NMVQAEQENDTSGWFDVLQK              |
| 1405-1412                             | TNLTSVTK                          |
| 1418-1425                             | NAIHNHIR                          |
| 1426-1433                             | LFEPLVIK                          |
| 1449-1461                             | QVLDLLAQLVQLR                     |
| 1480-1490                             | QFEYIEVGQFR                       |
| 1522-1534                             | IIQLCDGIMASGR                     |
| 1536-1555                             | AVTHAIPALQPIVHDLFVLR              |
| 1571-1579                             | EVVVSMLLR                         |
| 1580-1599                             | LIQYHQVLEMFILVLQQCHK              |
| 1611-1622                             | QIADIILPMLAK                      |
| 1684-1697                             | VLISQSTEDIVLSR                    |
| 1716-1732                             | LRDGDSTSTLEEHSSEK                 |
| 1736-1744                             | NLPEETFSR                         |
| 1870-1887                             | LLSPQMSGEEEDSDLAAK                |
| 1948-1962                             | NSAASGLFIQAIQSR                   |
| 1963-1973                             | CENLSTPTMLK                       |
| 1975-1997                             | TLQCLEGIHLSQSGAVLTLYVDR           |
| 2009-2016                             | MVDILACR                          |
| 2017-2040                             | RVEMLLAANLQSSMAQLPMEELNR          |
| 2018-2040                             | VEMLLAANLQSSMAQLPMEELNR           |
| 2041-2053                             | IQEYLQSSGLAQR                     |
| 2057-2063                             | LYSLDR                            |
| 2066-2099                             | LSTMQDSLSPSPVSSHPLDGDGHVSLETVSPDK |
| 2114-2127                             | SDSALLEGAELVNR                    |
| 2164-2171                             | SALFEAAR                          |
| 2178-2206                             | VSGTVQQLPAVHHVFQPELPAEPAAAYWSK    |
| 2207-2225                             | LNDLFGDAALYQSLPTLAR               |
| 2226-2236                             | ALAQYLVVSK                        |
| 2340-2356                             | AISEEEEEVDPNTQNPK                 |
| 2357-2381                             | YITAACEMVAEMVESLQSVLALGHK         |
| 2383-2395                             | NSGVP AFLTPLL R                   |
| 2396-2403                             | NIISLAR                           |
| 2404-2412                             | LPLVNSYTR                         |
| 2455-2463                             | INTLGWTSR                         |
| 2554-2566                             | GIVEQEIQAMVSK                     |
| 2568-2598                             | ENIATHHLYQAWDPVPSLSPATTGALISHEK   |

|           |                        |
|-----------|------------------------|
| 2599-2607 | LLLQINPER              |
| 2608-2615 | ELGSMSYK               |
| 2684-2692 | WILPSSSAR              |
| 2694-2704 | TPAILISEVVR            |
| 2705-2716 | SLLVVSDLFTR            |
| 2717-2730 | NQFELMYVTLTELK         |
| 2732-2750 | VHPSEDEILAQYLVPATCK    |
| 2751-2759 | AAAVLGMDK              |
| 2760-2767 | AVAEPVSR               |
| 2768-2774 | LLESTLR                |
| 2782-2802 | VGALHGVLYVLECDLLDDTAK  |
| 2803-2817 | QLIPVISDYLLSNLK        |
| 2887-2895 | LLLSEQLSR              |
| 2896-2903 | LDAESLVK               |
| 2940-2959 | TSDPNPAAPDSESVIVAMER   |
| 2960-2966 | VSVLFDR                |
| 2981-2998 | ILPQFLDDFFPPQDIMNK     |
| 2999-3020 | VIGEFLSNQQPYPQFMATVVYK |
| 3021-3035 | VFQTLHSTGQSSMVR        |
| 3103-3111 | HQIEEELDR              |
| 3103-3112 | HQIEEELDRR             |
| 3113-3130 | AFQSVLEVVAAPGSPYHR     |

## Supporting Information Figure legends

### S Figure 1 – Purification of recombinant FLAG-huntingtins

**Panel A** Plot (top) of Superose 6<sup>TM</sup>10/300 gel filtration column elution profile of FLAG-bead enriched protein. Coomassie blue stained bands on SDS PAGE (bottom left), demonstrate a discrete peak of Q23 huntingtin (Htt) well separated from the void volume protein peak (\*). The column profiles were similar for Q32 and Q43 huntingtins (data not shown). Calibration standards: High MW marker (B: Blue Dextran, T: Thyroglobulin (670 kDa), F: Ferritin (440 kDa), C: Catalase (232 kDa), A: Aldolase (150 kDa). SDS PAGE (bottom right) intact highly purified >350 kDa Q23 huntingtin in pooled peak fractions (13.0 – 14.0 ml) by Coomassie Blue stain (lane 1) and immunoblot analysis with amino terminal mAb 2166 (lane 2) and HF1 carboxyl terminal huntingtin antibody (lane 3). Similar purification data for full-length Q32- and Q43 huntingtin is not shown.

**Panel B** SDS PAGE Coomassie blue stain and immunoblot analysis of recombinant FLAG Q23, Q32, Q43-huntingtins reveals the impact of increasing the polyglutamine region in disproportionally decreasing huntingtin mobility and increasing mAb 1F8 detectability of the polyglutamine tract, as reported for endogenous huntingtins (10, 58, 59). Marker (M).

## **S Figure 2 – Negative stain EM analysis of Q23, Q32 and Q43 huntingtins**

**Panel A** The 100 class averages resulting from classification of 10,000 interactively selected particles of negatively stained Q23 huntingtin. While the class averages show distinct structural features, these vary greatly between different classes. Since SDS PAGE and mass spectrometry analysis revealed high purity, the majority of classes should represent huntingtin. Adsorption to the carbon support film in different orientations is unlikely to account for all of the structural variability, indicating that huntingtin is a flexible molecule that can adopt different conformations. The side length of the individual class averages is 28.8 nm, demonstrating the varied structure variability.

**Panel B** Raw image (left) and 100 class averages resulting from classification of 10,061 particle images of negatively stained Q32 huntingtin. Bottom: Raw image (left) and 100 class averages resulting from classification of 10,078 particle images of negatively stained Q43 huntingtin, showing that the structural variability of huntingtins with different polyglutamine regions is similar to that of Q23 huntingtin. The scale bars represent 50 nm and the side length of the panels showing individual class averages is 28.8 nm.

### **S Figure 3 – Normal histone H3K27 di-methylation and nuclear huntingtin PRC2**

**Panel A** Fluorescent microscope images of immunostained embryoid body sections show decreased histone H3K27me3 signal in *Hdh<sup>ex/4/5</sup>/Hdh<sup>ex/4/5</sup>* cells, at day 4 and day 6, but levels similar to wild-type *Hdh<sup>+</sup>/Hdh<sup>+</sup>* cells at day 11, indicating inefficient histone H3K27 tri-methylation in the absence of huntingtin.

**Panel B** Confocal images of immunostained sections of day 4 *Hdh<sup>+</sup>/Hdh<sup>+</sup>* (WT) and *Hdh<sup>ex/4/5</sup>/Hdh<sup>ex/4/5</sup>* (KO) huntingtin null and knock-in *Hdh<sup>+</sup>/Hdh<sup>Q111</sup>* (KI) embryoid bodies, revealed similar histone H3K27me2 stain and plot of immunoblot histone H3K27me2/H3 band intensity ratio, normalized to wild-type (white bar), confirmed similar levels of histone H3K27me2 in KO (black bar) and KI (grey bar), compared to wild-type (white bar) extracts (n=4).

**Panel C** Immunoblot demonstrating huntingtin (~ 350 kDa), detected by mAb 2166, in wild-type *Hdh<sup>+</sup>/Hdh<sup>+</sup>* ES cell total extract (T), as well as the cytosolic (C) and nuclear (N) sub-cellular fractions. Bands of tubulin and fibrillarin indicate purity of the cytosolic and nuclear extracts, respectively.

**Panel D** Immunoblot (left) showing huntingtin, from day 4 wild-type *Hdh<sup>+</sup>/Hdh<sup>+</sup>* embryoid body nuclei, detected in Superose 6<sup>TM</sup> HR 16/60 size exclusion chromatography fractions, together with Ezh2 and Suz12, eluting with a peak size of ~810 kDa. Size standards (arrowheads): Thyroglobulin (670 kDa), Ferritin (440 kDa), Catalase (232 kDa). Huntingtin and Ezh2 in peak fractions co-immunoprecipitated (data not shown).

**S Figure 4 – Huntingtin stimulated PRC2 tri-methylation *in vitro***

**Panel A** Autoradiogram (top) of bands of  $^3\text{H}$ -methyl histone H3 produced by reconstituted PRC2, and plot (below) of quantified band intensities (3 experiments), relative to no added huntingtin (0 Htt), demonstrating that Q23 huntingtin (Htt) significantly ( $*P < 0.05$ ) stimulated PRC2 activity in a dose (2-40 nM) dependent manner.

**Panel B** Autoradiogram (top) showing  $^3\text{H}$ -methyl histone H3 bands, and plot (bottom) of the quantified band intensities (no huntingtin open bar, added huntingtin filled bar) (3 experiments), demonstrating that Q23 huntingtin (Htt) significantly ( $*P < 0.05$ ) stimulated PRC2 over a range of nucleosome array concentrations (25 – 100 nM).

**Panel C** Immunoblot (top) showing bands of di-methyl (H3K27me2) and tri-methyl (H3K27me3) histone H3, and plot (below) of quantified ratio of the H3K27me2/H3 and H3K27me3/H3 histone band intensities from 3 experiments, normalized to ratios obtained in the absence (white bar) or presence of huntingtin (Htt) (black bar), demonstrating that the presence (+) of Q23 huntingtin (Htt) significantly ( $*P < 0.05$ ) increased PRC2-dependent tri-methyl histone H3K27, but decreased di-methyl histone H3K27, compared to reactions without added huntingtin (-).



S Figure 1

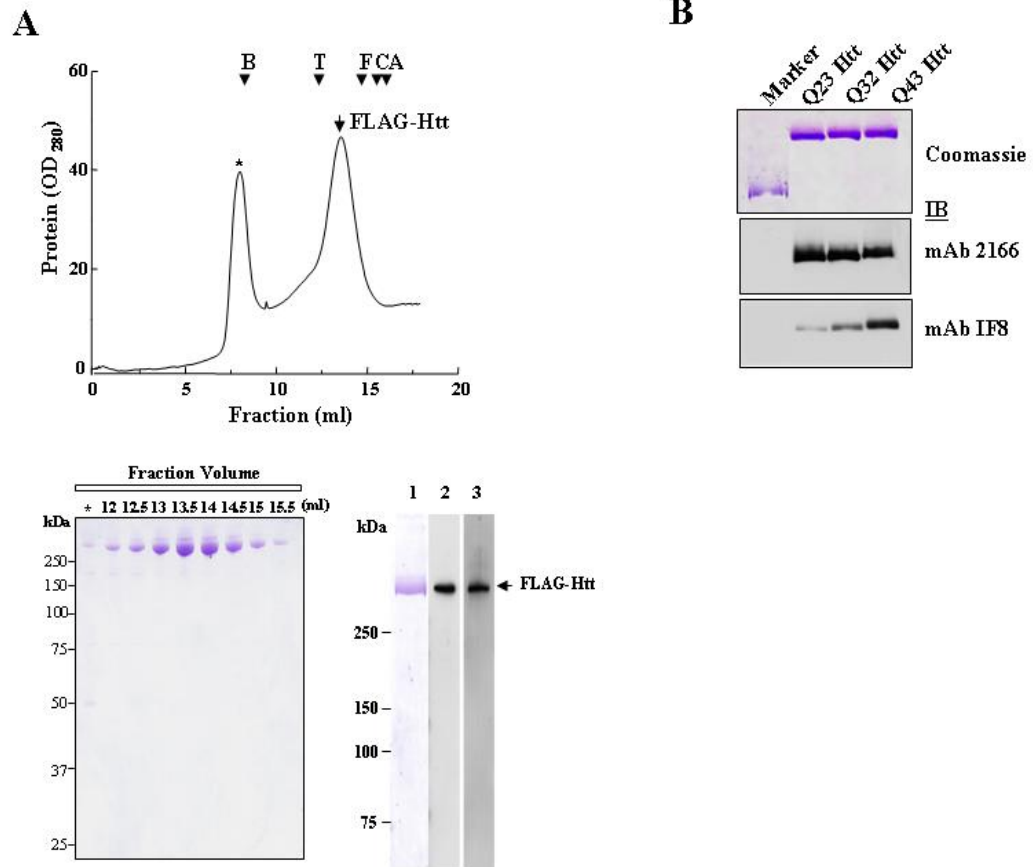

S Figure 2

**A**

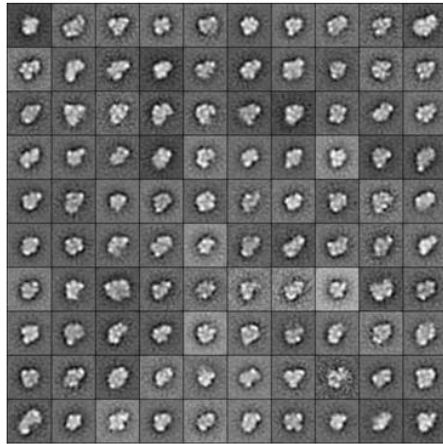

**B**

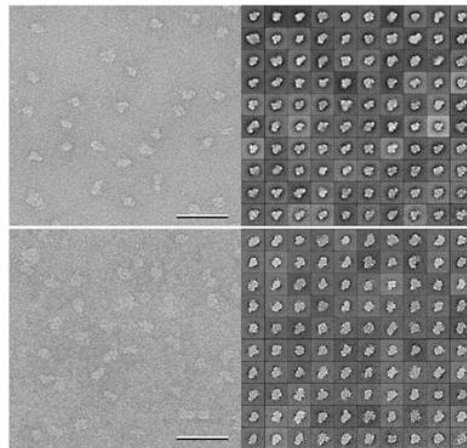

S Figure 3

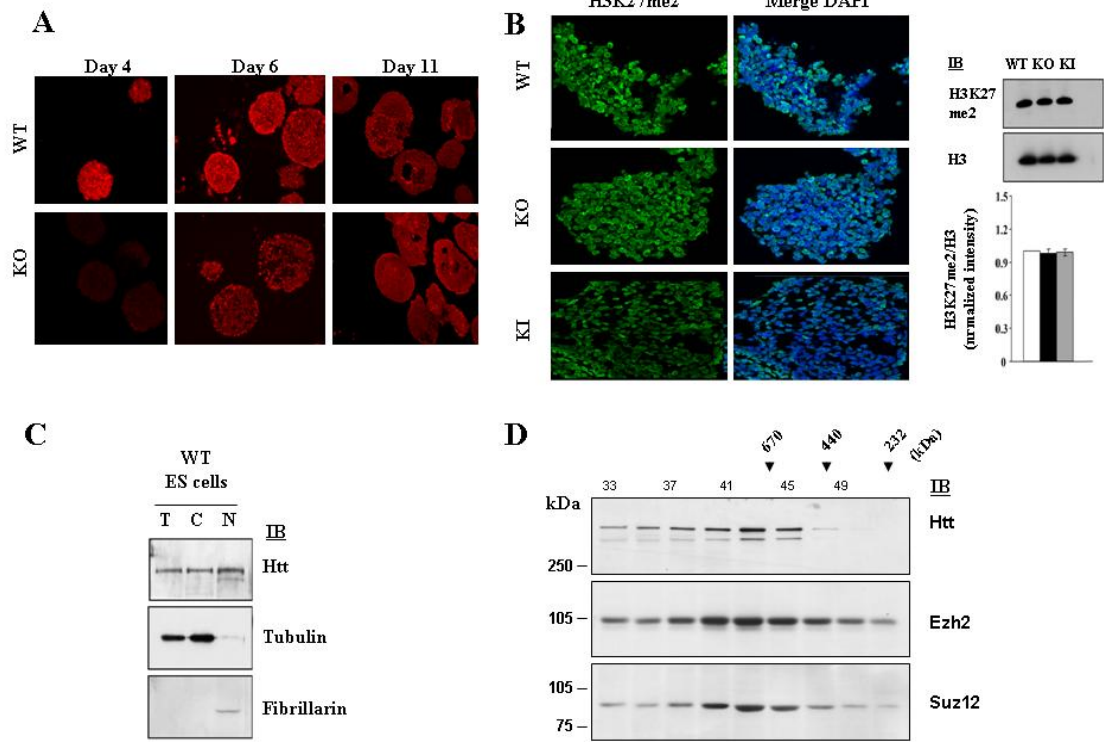

S Figure 4

**A**

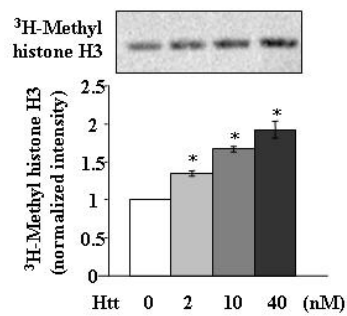

**B**

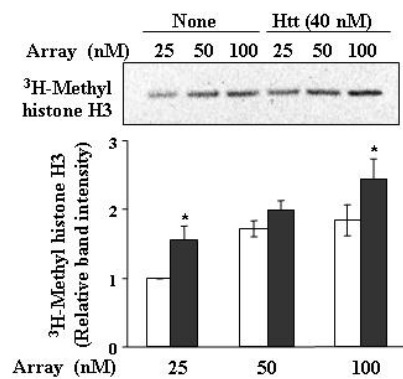

**C**

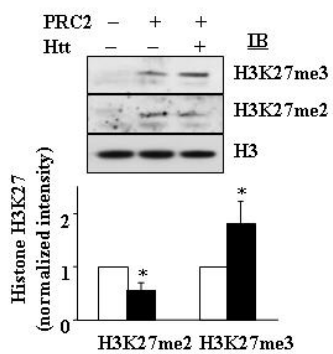

Supplement: ddp524_1.pdf [file ddp524_1.pdf]
